# Supplementary material for: Serum biomarker for diagnostic evaluation of pulmonary arterial hypertension in systemic sclerosis
Source: Springer Nature journal article supplement (doi:10.1186/s13075-018-1679-8), 2018-08-16
Supplement: MOESM1 [file 16041578]

**Additional Table 1: Detailed hemodynamic measurements and clinical characteristics of discovery cohort**

| StudyID | Sex | Age | WHO class | PAH | Treated | Sample at RHC | Hemodynamic Measurements |             |                   | BNP w/in 1 yr of RHC | BNP (pg/mL) | ILD | HRCT | Echo w/in 1 yr of RHC | PASP (mmHg) |
|---------|-----|-----|-----------|-----|---------|---------------|--------------------------|-------------|-------------------|----------------------|-------------|-----|------|-----------------------|-------------|
|         |     |     |           |     |         |               | mPCWP (mmHg)             | mPAP (mmHg) | PVR (Woods Units) |                      |             |     |      |                       |             |
| 1079    | F   | 66  | III       | YES | No      | YES           | 12                       | 60          | 11.5              | YES                  | 61          | NO  | NO   | -                     |             |
| 1140    | F   | 58  | III       | YES | No      | YES           | 9                        | 43          | 5.5               | YES                  | 178         | NO  | YES  | 80                    |             |
| 1164    | F   | 70  | II        | YES | No      | YES           | 9                        | 48          | 8.8               | YES                  | 71          | NO  | NO   | -                     |             |
| 1293    | F   | 57  | II        | YES | No      | YES           | 11                       | 43          | 7.9               | YES                  | 154         | YES | YES  | -                     |             |
| 1314    | F   | 59  | III       | YES | No      | YES*          | 13                       | 68          | 23.6              | No                   | 49          | NO  | YES  | 90                    |             |
| 1315    | F   | 68  | II        | YES | No      | YES           | 7                        | 45          | 8.0               | YES                  | 100         | NO  | NO   | -                     |             |
| 1335    | F   | 59  | II        | YES | No      | YES           | 4                        | 40          | 13.3              | -                    | -           | NO  | YES  | -                     |             |
| 1369    | F   | 65  | -         | YES | No      | YES           | 8                        | 34          | 4.7               | -                    | -           | NO  | YES  | -                     |             |
| 1372    | F   | 70  | -         | YES | No      | YES           | 14                       | 47          | 9.2               | YES                  | 498         | NO  | YES  | 64                    |             |
| 1375    | F   | 56  | II        | YES | No      | YES           | 9                        | 46          | 6.4               | YES                  | 42          | NO  | NO   | -                     |             |
| 1382    | F   | 81  | -         | YES | No      | YES           | 11                       | 49          | 8.8               | YES                  | 1054        | NO  | YES  | 87                    |             |
| 1388    | F   | 64  | -         | YES | No      | YES           | 11                       | 37          | 6.5               | YES                  | 140         | NO  | YES  | 106                   |             |
| 1420    | M   | 74  | II        | YES | No      | YES           | 12                       | 42          | 7.4               | YES                  | 524         | NO  | YES  | 84                    |             |

\*blood taken within a week
