# Supplementary material for: Serum biomarker for diagnostic evaluation of pulmonary arterial hypertension in systemic sclerosis
Source: Springer Nature journal article supplement (doi:10.1186/s13075-018-1679-8), 2018-08-16
Supplement: MOESM2 [file 16041578]

| Names                   | TargetFullName                                                    | EntrezGeneSymbol  | P. Value | Adjusted P | Log FC |
|-------------------------|-------------------------------------------------------------------|-------------------|----------|------------|--------|
| Midkine                 | Midkine                                                           | MDK               | 0.01     | 0.15       | 2.54   |
| SARP-2                  | Secreted frizzled-related protein 1                               | SFRP1             | 0.01     | 0.14       | 2.50   |
| I-TAC                   | C-X-C motif chemokine 11                                          | CXCL11            | 0.00     | 0.08       | 1.02   |
| sRAGE                   | Advanced glycosylation end product-specific receptor, soluble     | AGER              | 0.01     | 0.14       | 0.92   |
| BLC                     | C-X-C motif chemokine 13                                          | CXCL13            | 0.00     | 0.05       | 0.89   |
| NACA                    | Nascent polypeptide-associated complex subunit alpha              | NACA              | 0.00     | 0.09       | 0.80   |
| sE-Selectin             | E-Selectin                                                        | SELE              | 0.00     | 0.09       | 0.70   |
| 6Ckine                  | C-C motif chemokine 21                                            | CCL21             | 0.00     | 0.04       | 0.70   |
| HGF                     | Hepatocyte growth factor                                          | HGF               | 0.00     | 0.07       | 0.66   |
| Tenascin                | Tenascin                                                          | TNC               | 0.01     | 0.15       | 0.65   |
| Ferritin                | Ferritin                                                          | FTH1 FTL          | 0.01     | 0.10       | 0.65   |
| GFRA-1                  | GDNF family receptor alpha-1                                      | GFRA1             | 0.00     | 0.08       | 0.64   |
| ANG14                   | Angiopoietin-related protein 4                                    | ANGPTL4           | 0.00     | 0.08       | 0.64   |
| AREG                    | Amphiregulin                                                      | AREG              | 0.01     | 0.15       | 0.61   |
| Spondin-1               | Spondin-1                                                         | SPON1             | 0.00     | 0.06       | 0.55   |
| FSTL3                   | Follistatin-related protein 3                                     | FSTL3             | 0.00     | 0.04       | 0.55   |
| TIG2                    | Retinoic acid receptor responder protein 2                        | RARRES2           | 0.00     | 0.03       | 0.54   |
| Activin A               | Inhibin beta A chain                                              | INHBA             | 0.00     | 0.05       | 0.53   |
| b2-Microglobulin        | Beta-2-microglobulin                                              | B2M               | 0.00     | 0.07       | 0.53   |
| FGF7                    | Fibroblast growth factor 7                                        | FGF7              | 0.00     | 0.08       | 0.51   |
| MIP-3b                  | C-C motif chemokine 19                                            | CCL19             | 0.00     | 0.08       | 0.50   |
| Integrin a1b1           | Integrin alpha-I: beta-1 complex                                  | ITGA1 ITGB1       | 0.00     | 0.05       | 0.49   |
| sFRP-3                  | Secreted frizzled-related protein 3                               | FRZB              | 0.01     | 0.15       | 0.42   |
| TIMP-1                  | Metalloproteinase inhibitor 1                                     | TIMP1             | 0.00     | 0.04       | 0.41   |
| Coagulation Factor IXab | Coagulation factor IXab                                           | F9                | 0.01     | 0.15       | 0.38   |
| Laminin                 | Laminin                                                           | LAMA1 LAMB1 LAMC1 | 0.00     | 0.07       | 0.36   |
| IL-2                    | Interleukin-2                                                     | IL2               | 0.00     | 0.01       | 0.35   |
| XEDAR                   | Tumor necrosis factor receptor superfamily member 27              | EDA2R             | 0.00     | 0.04       | 0.34   |
| IL-2 sRg                | Cytokine receptor common subunit gamma                            | IL2RG             | 0.01     | 0.15       | 0.33   |
| Cathepsin H             | Cathepsin H                                                       | CTSH              | 0.00     | 0.03       | 0.29   |
| LCMT1                   | Leucine carboxyl methyltransferase 1                              | LCMT1             | 0.00     | 0.00       | 0.27   |
| Layilin                 | Layilin                                                           | LAYN              | 0.01     | 0.15       | 0.24   |
| CK-MM                   | Creatine kinase M-type                                            | CKM               | 0.01     | 0.11       | -1.20  |
| Apo A-I                 | Apolipoprotein A-I                                                | APOA1             | 0.00     | 0.00       | -1.23  |
| Cathepsin V             | Cathepsin L2                                                      | CTSV              | 0.00     | 0.01       | -1.46  |
| CDON                    | Cell adhesion molecule-related/down-regulated by oncogenes        | CDON              | 0.00     | 0.01       | -1.77  |
| HAI-1                   | Kunitz-type protease inhibitor 1                                  | SPINT1            | 0.00     | 0.04       | -1.85  |
| Antithrombin III        | Antithrombin-III                                                  | SERPINC1          | 0.00     | 0.03       | -2.03  |
| CD36 ANTIGEN            | Platelet glycoprotein 4                                           | CD36              | 0.01     | 0.14       | -2.04  |
| Apo E                   | Apolipoprotein E                                                  | APOE              | 0.00     | 0.08       | -2.07  |
| Apo E2                  | Apolipoprotein E (isoform E2)                                     | APOE              | 0.00     | 0.06       | -2.07  |
| Kininogen, HMW          | Kininogen-1                                                       | KNG1              | 0.00     | 0.01       | -2.18  |
| ERBB1                   | Epidermal growth factor receptor                                  | EGFR              | 0.00     | 0.01       | -2.23  |
| RGM-C                   | Hemojuvelin                                                       | HFE2              | 0.00     | 0.04       | -2.25  |
| Prekallikrein           | Plasma kallikrein                                                 | KLKB1             | 0.00     | 0.02       | -2.29  |
| Apo E4                  | Apolipoprotein E (isoform E4)                                     | APOE              | 0.00     | 0.07       | -2.46  |
| EMR2                    | EGF-like module-containing mucin-like hormone receptor-like 2     | EMR2              | 0.00     | 0.08       | -2.53  |
| ENTP5                   | Ectonucleoside triphosphate diphosphohydrolase 5                  | ENTPD5            | 0.00     | 0.03       | -2.66  |
| GDF-11                  | Growth/differentiation factor 11                                  | GDF11             | 0.00     | 0.06       | -2.69  |
| HSP70 protein 8         | Heat shock cognate 71 kDa protein                                 | HSPA8             | 0.01     | 0.15       | -2.69  |
| DAF                     | Complement decay-accelerating factor                              | CD55              | 0.00     | 0.07       | -2.69  |
| TrkB                    | BDNF/NT-3 growth factors receptor                                 | NTRK2             | 0.00     | 0.04       | -2.70  |
| Apo E3                  | Apolipoprotein E (isoform E3)                                     | APOE              | 0.01     | 0.13       | -2.72  |
| TGF-b R III             | Transforming growth factor beta receptor type 3                   | TGFB3             | 0.00     | 0.09       | -2.73  |
| contactin-1             | Contactin-1                                                       | CNTN1             | 0.00     | 0.07       | -2.83  |
| ATS13                   | A disintegrin and metalloproteinase with thrombospondin motifs 13 | ADAMTS13          | 0.01     | 0.13       | -2.85  |
| SET                     | Protein SET                                                       | SET               | 0.00     | 0.05       | -2.86  |
| Gelsolin                | Gelsolin                                                          | GSN               | 0.00     | 0.04       | -2.91  |
| kallikrein 8            | Kallikrein-8                                                      | KLK8              | 0.00     | 0.10       | -2.92  |
| Coagulation Factor XI   | Coagulation Factor XI                                             | F11               | 0.00     | 0.08       | -2.99  |
| Met                     | Hepatocyte growth factor receptor                                 | MET               | 0.01     | 0.12       | -3.20  |
| Kallistatin             | Kallistatin                                                       | SERPINA4          | 0.00     | 0.09       | -3.29  |
| Afamin                  | Afamin                                                            | AFM               | 0.01     | 0.13       | -3.32  |
| Galectin-3              | Galectin-3                                                        | LGALS3            | 0.01     | 0.15       | -3.48  |
| Notch 1                 | Neurogenic locus notch homolog protein 1                          | NOTCH1            | 0.00     | 0.04       | -3.57  |
| Calcineurin             | Calcineurin                                                       | PPP3CA PPP3R1     | 0.01     | 0.13       | -3.57  |
| paraoxonase 1           | Serum paraoxonase/arylesterase 1                                  | PON1              | 0.01     | 0.15       | -3.76  |
| dopa decarboxylase      | Aromatic-L-amino-acid decarboxylase                               | DDC               | 0.01     | 0.15       | -3.85  |
| a2-Antiplasmin          | Alpha-2-antiplasmin                                               | SERPINF2          | 0.01     | 0.14       | -4.07  |
| ERBB4                   | Receptor tyrosine-protein kinase erbB-4                           | ERBB4             | 0.00     | 0.07       | -4.29  |
| CD27                    | CD27 antigen                                                      | CD27              | 0.01     | 0.15       | -4.43  |
| KIR33                   | Kin of IRRE-like protein 3                                        | KIRREL3           | 0.00     | 0.04       | -4.60  |
| HIV-2 Rev               | Protein Rev_HV2BE                                                 | Human-virus       | 0.01     | 0.13       | -4.67  |
| TACI                    | Tumor necrosis factor receptor superfamily member 13B             | TNFRSF13B         | 0.00     | 0.06       | -4.70  |
| LRIG3                   | Leucine-rich repeats and immunoglobulin-like domains protein 3    | LRIG3             | 0.01     | 0.13       | -4.73  |
| Thyroglobulin           | Thyroglobulin                                                     | TG                | 0.01     | 0.13       | -5.66  |
| HPV E7 Type 16          | Protein E7_HPV16                                                  | Human-virus       | 0.00     | 0.04       | -6.25  |
| IFN-lambda 2            | Interferon lambda-2                                               | IFNL2             | 0.00     | 0.07       | -6.47  |
| IL-20 Ra                | Interleukin-20 receptor subunit alpha                             | IL20RA            | 0.01     | 0.13       | -6.90  |
| IL-4                    | Interleukin-4                                                     | IL4               | 0.00     | 0.02       | -7.29  |
| ADAMTS-4                | A disintegrin and metalloproteinase with thrombospondin motifs 4  | ADAMTS4           | 0.00     | 0.08       | -7.52  |
| GIIE                    | Group IIE secretory phospholipase A2                              | PLA2G2E           | 0.01     | 0.15       | -8.48  |

**Additional Table 2: Complete list of differentially regulated proteins**  
82-proteins were found to be differentially regulated in lcSSc-PAH patients compared to lcSSc controls (False Discovery Rate  $q \leq 0.1$ )
