# Supplementary material for: Serum biomarker for diagnostic evaluation of pulmonary arterial hypertension in systemic sclerosis
Source: Springer Nature journal article supplement (doi:10.1186/s13075-018-1679-8), 2018-08-16
Supplement: MOESM3 [file 16041578]

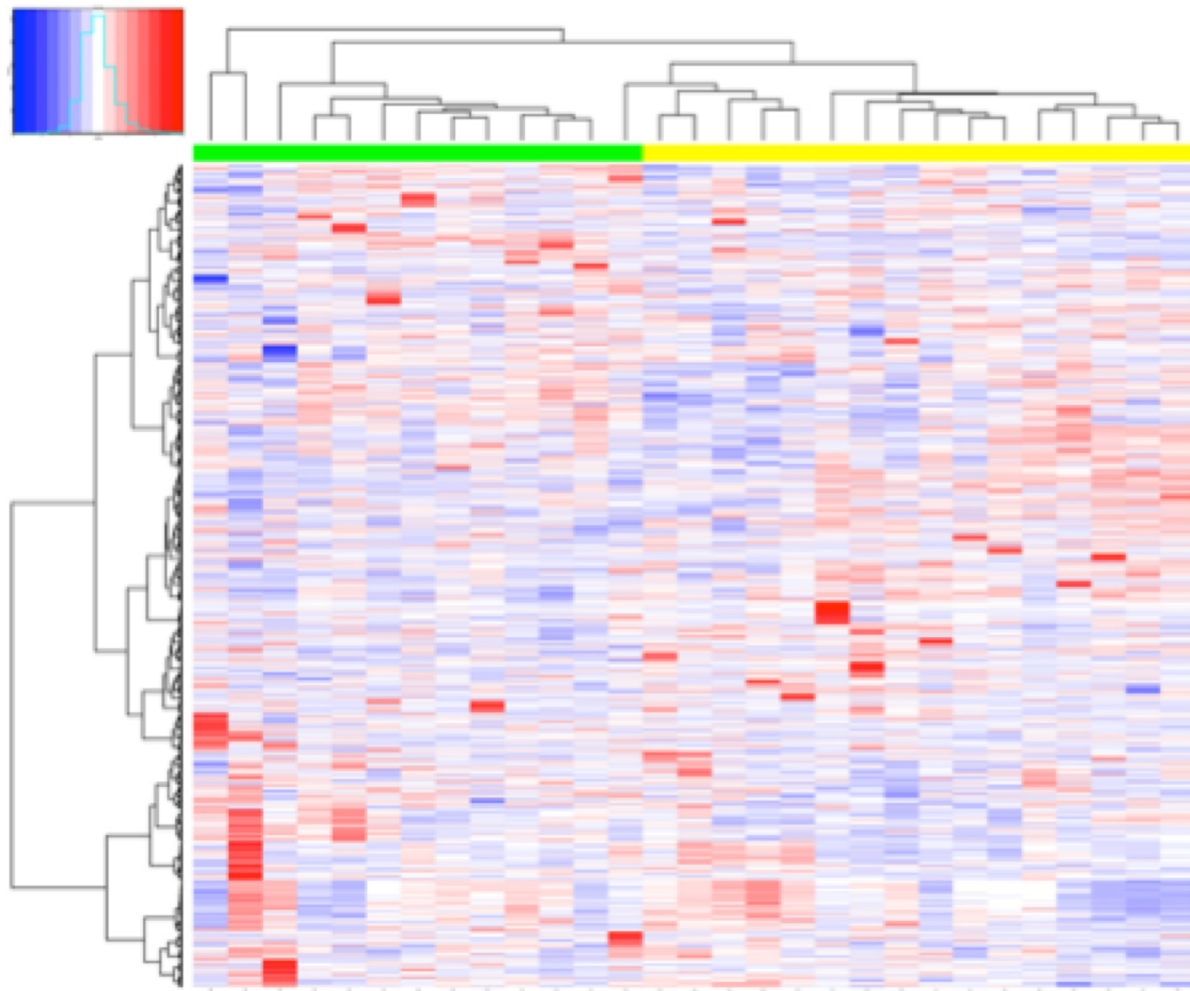

**Additional Figure 1: Unfiltered clustering diagram of all 1129 measured proteins**

Unsupervised hierarchal clustering of lcSSc-PAH patients (green color bar) and lcSSc patients with no lung disease (yellow color bar). Here, red and blue indicate high or low expression
