# Supplementary material for: Serum biomarker for diagnostic evaluation of pulmonary arterial hypertension in systemic sclerosis
Source: Springer Nature journal article supplement (doi:10.1186/s13075-018-1679-8), 2018-08-16
Supplement: MOESM5 [file 16041578]

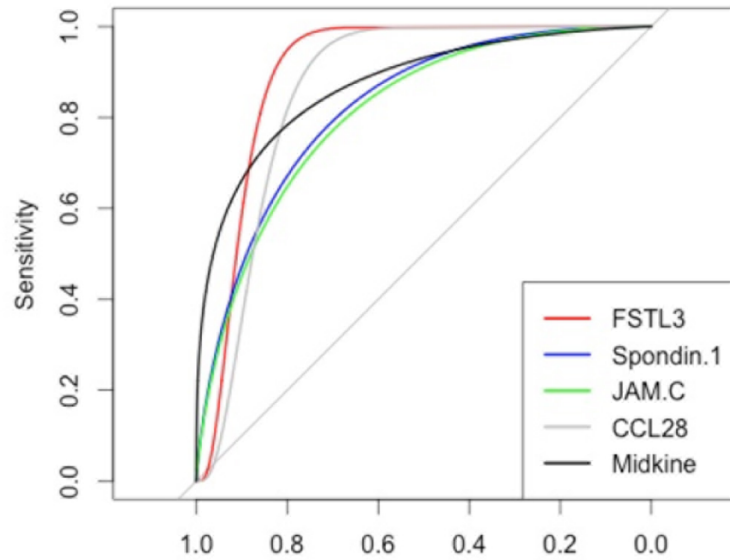

| Protein   | AUC  | CI        | Sensitivity | Specificity |
|-----------|------|-----------|-------------|-------------|
| FSTL3     | 0.90 | 0.75-0.95 | 0.96        | 0.79        |
| Spondin-1 | 0.84 | 0.65-0.93 | 0.78        | 0.71        |
| JAM-C     | 0.82 | 0.62-0.92 | 0.77        | 0.70        |
| CCL28     | 0.87 | 0.69-0.94 | 0.94        | 0.72        |
| Midkine   | 0.89 | 0.72-0.95 | 0.76        | 0.82        |

**Additional Figure 2: Receiver operator characteristic curves of SOMALogic**

Receiver operator characteristic curves (ROCs) based on in silico (logistic regression)
