# Supplementary material for: Serum biomarker for diagnostic evaluation of pulmonary arterial hypertension in systemic sclerosis
Source: Springer Nature journal article supplement (doi:10.1186/s13075-018-1679-8), 2018-08-16
Supplement: MOESM6 [file 16041578]

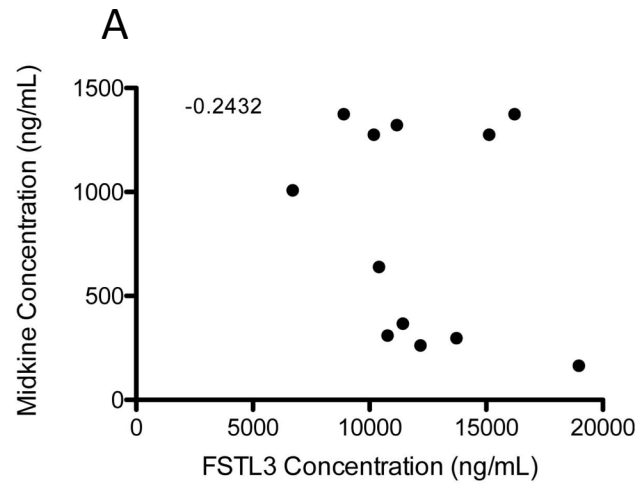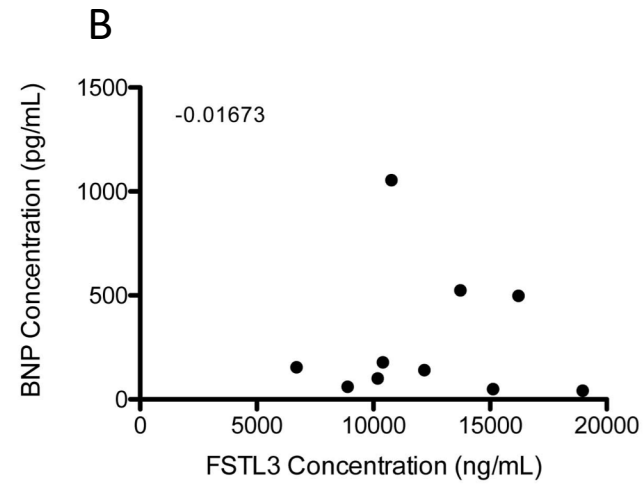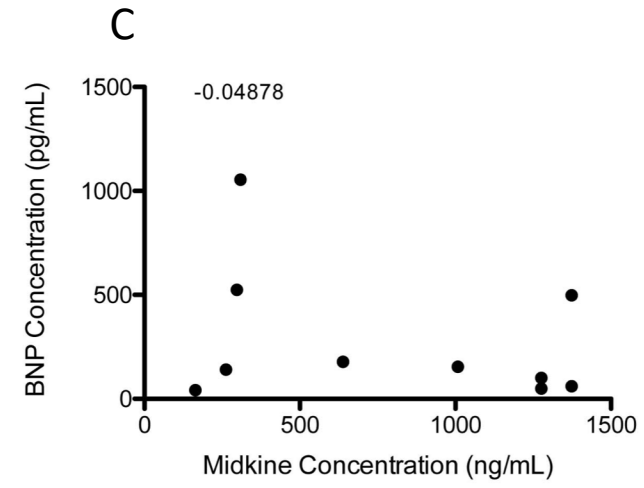

**Additional Figure 3: Correlations of Midkine, FSTL3 and BNP**

Protein levels of Midkine, FSTL3 and BNP are plotted as linear regressions spearman's correlation coefficients are reported in the upper left corner of each graphic. A examines the correlation between FSTL3 and Midkine, B the correlation between FSTL3 and BNP, C Midkine and BNP
