# Supplementary material for: Serum biomarker for diagnostic evaluation of pulmonary arterial hypertension in systemic sclerosis
Source: Springer Nature journal article supplement (doi:10.1186/s13075-018-1679-8), 2018-08-16
Supplement: MOESM7 [file 16041578]

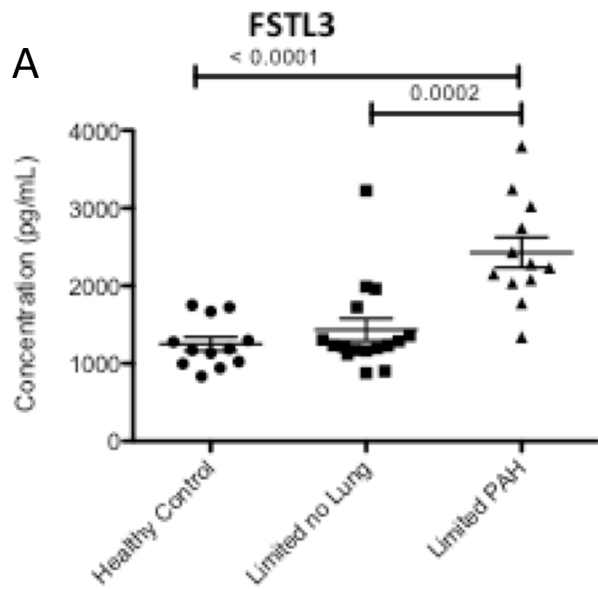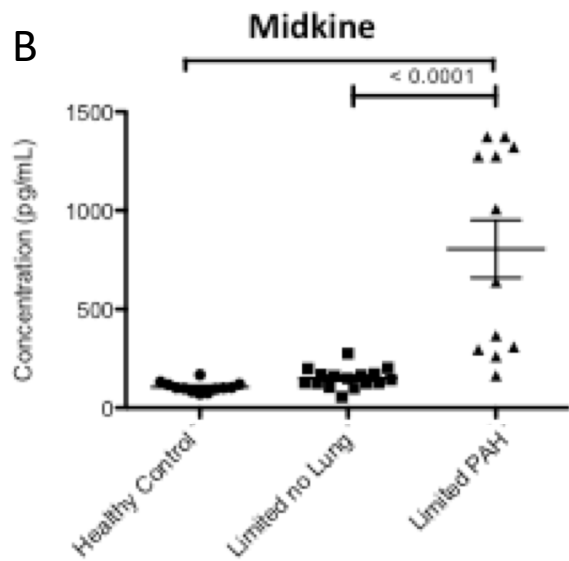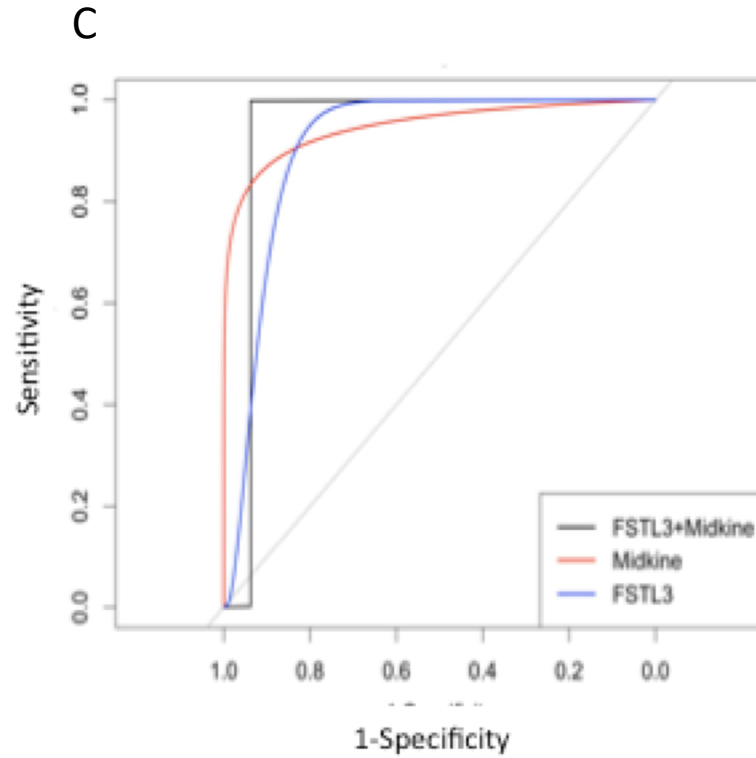

| Protein       | AUC  | CI        | Sensitivity | Specificity |
|---------------|------|-----------|-------------|-------------|
| FSTL3         | 0.91 | 0.75-0.95 | 0.95        | 0.80        |
| Midkine       | 0.94 | 0.80-0.96 | 0.84        | 0.93        |
| FSTL3+Midkine | 0.99 | 0.98-1.0  | 0.99        | 0.94        |

**Additional Figure 4: Concentrations of Midkine, FSTL3**

Concentrations of FSTL3 (A) and Midkine (B) were measured by ELISA and modeled together using multiple logistic regression (C)
