# Supplementary material for: Serum biomarker for diagnostic evaluation of pulmonary arterial hypertension in systemic sclerosis
Source: Springer Nature journal article supplement (doi:10.1186/s13075-018-1679-8), 2018-08-16
Supplement: MOESM8 [file 16041578]

A

| StudyID   | Sex | Age | PAH | Treated | Treatment                  | Sample at RHC       | Hemodynamic Measurements |             |                   |                      |             | ILD | HRCT | w/in 1 yr of | PASP (mmHg) |
|-----------|-----|-----|-----|---------|----------------------------|---------------------|--------------------------|-------------|-------------------|----------------------|-------------|-----|------|--------------|-------------|
|           |     |     |     |         |                            |                     | mPCWP (mmHg)             | mPAP (mmHg) | PVR (Woods Units) | BNP w/in 1 yr of RHC | BNP (pg/mL) |     |      |              |             |
| Tufts_403 | F   | 54  | YES | YES     | PDE-5                      | YES                 | 15                       | 47          | 6.4               | YES                  | 157         | NO  | -    | -            |             |
| Tufts_333 | F   | 77  | YES | No      | -                          | YES                 | 5                        | 60          | 27.0              | YES                  | 926         | NO  | -    | -            |             |
| Tufts_347 | M   | 80  | YES | No      | -                          | YES                 | 11                       | 43          | 6.4               | YES                  | 962         | NO  | -    | -            |             |
| Tufts_351 | F   | 61  | YES | No      | -                          | YES                 | 7                        | 51          | 7.8               | YES                  | 64          | NO  | -    | -            |             |
| Tufts_003 | F   | 82  | YES | No      | -                          | YES                 | 15                       | 53          | 7.9               | No                   | 1630        | YES | -    | -            |             |
| Tufts_014 | F   | 70  | YES | YES     | Ca Channel Blk             | YES                 | 13                       | 37          | 7.5               | YES                  | 78          | NO  | -    | -            |             |
| Tufts_101 | F   | 85  | YES | No      | -                          | YES                 | 8                        | 27          | 4.2               | YES                  | 64          | NO  | -    | -            |             |
| Tufts_106 | F   | 67  | YES | YES     | PGE-2                      | YES                 | 13                       | 34          | 4.0               | YES                  | 64          | NO  | -    | -            |             |
| Tufts_265 | F   | 58  | YES | No      | ERA and PDE-5              | YES                 | 7                        | 30          | 3.5               | YES                  | 138         | NO  | -    | -            |             |
| Tufts_278 | M   | 61  | YES | No      | -                          | YES                 | 10                       | 34          | 3.9               | YES                  | 12          | NO  | -    | -            |             |
| Tufts_395 | M   | 68  | YES | No      | -                          | YES                 | 13                       | 46          | 7.3               | YES                  | 129         | NO  | -    | -            |             |
| 1323      | F   | 60  | YES | No      | -                          | YES                 | -                        | 69          | 10                | -                    | -           | NO  | -    | -            |             |
| 1405      | F   | 67  | YES | YES     | ACE and Hydroxychloroquine | YES                 | 14                       | 26          | 3.00              | YES                  | 127         | NO  | -    | -            |             |
| 1481      | F   | 71  | YES | No      | ACE                        | YES                 | 4                        | 48          | 11.0              | YES                  | 248         | NO  | -    | -            |             |
| 1483      | F   | 63  | YES | YES     | Hydroxychloroquine         | YES                 | 10                       | 57          | 11.6              | YES                  | 234         | YES | -    | -            |             |
| 1815      | F   | 64  | YES | YES     | PGE-2                      | YES                 | 1                        | 47          | 13.4              | YES                  | 1408        | NO  | -    | -            |             |
| 1176      | F   | 66  | YES | YES     | Corticosteroid and ACE     | YES*                | 14                       | 32          | 3.4               | YES                  | 411         | NO  | -    | -            |             |
| 1507      | F   | 62  | YES | YES     | PGE-2                      | YES                 | 3                        | 41          | 11.2              | YES                  | 1277        | NO  | -    | -            |             |
| 1492      | F   | 58  | YES | YES     | Cyclo                      | NO (22 days after)  | 14                       | 46          | 6.2               | YES                  | 414         | YES | -    | -            |             |
| 1779      | F   | 64  | YES | YES     | ACE                        | YES                 | 8                        | 60          | 12.3              | YES                  | 465         | NO  | -    | -            |             |
| 1477      | F   | 73  | YES | No      | -                          | NO (1 month before) | 15                       | 29          | 3.3               | YES                  | 110         | NO  | -    | -            |             |
| 1716      | M   | 52  | YES | YES     | Corticosteroid and ACE     | YES                 | 7                        | 31          | 3.9               | YES                  | 42          | NO  | -    | -            |             |
| 1436      | F   | 59  | YES | No      | -                          | YES                 | 12                       | 26          | 3.8               | YES                  | 89          | NO  | -    | -            |             |

\*blood taken within a week

B

| StudyID | Sex | Age | PAH | Treated | Treatment                     | Sample at RHC        | Hemodynamic Measurements |             |                   |                      |             | ILD |
|---------|-----|-----|-----|---------|-------------------------------|----------------------|--------------------------|-------------|-------------------|----------------------|-------------|-----|
|         |     |     |     |         |                               |                      | mPCWP (mmHg)             | mPAP (mmHg) | PVR (Woods Units) | BNP w/in 1 yr of RHC | BNP (pg/mL) |     |
| P1      | F   | 70  | YES | YES     | ARB, Ca Channel Blk           | YES                  | 10                       | 54          | 12.90             | No                   | -           | NO  |
| P2      | F   | 56  | YES | YES     | Ca Channel Blk                | No (3 months before) | 15                       | 42          | 4.96              | Yes                  | 88          | NO  |
| P3      | F   | 73  | YES | YES     | ACE                           | No (3 years before)  | 15                       | 39          | missing           | No                   | -           | NO  |
| P7      | F   | 66  | YES | YES     | Ca Channel Blk                | No (2 years before)  | 7                        | 28          | 3.23              | No                   | -           | NO  |
| P8      | F   | 70  | YES | YES     | ACE                           | YES*                 | 8                        | 49          | missing           | Yes                  | 1333        | NO  |
| P10     | F   | 81  | YES | YES     | Ca Channel Blk                | YES                  | 9                        | 26          | missing           | Yes                  | 84          | NO  |
| P11     | F   | 56  | YES | YES     | ACE                           | No (1 year before)   | 10                       | 51          | 7.24              | No                   | -           | NO  |
| P12     | F   | 66  | YES | YES     | ACE                           | No (3 months after)  | 5                        | 32          | 5.91              | No                   | -           | NO  |
| P13     | F   | 52  | YES | YES     | Ca Channel Blk                | No (3 months before) | 8                        | 44          | missing           | Yes                  | 449         | NO  |
| P14     | F   | 57  | YES | YES     | ACE, PGE-2, Immunosuppressant | No (2 years before)  | missing                  | 25          | missing           | No                   | -           | NO  |
| P16     | F   | 74  | YES | YES     | ACE, Ca Channel Blk           | YES                  | 8                        | 51          | 12.65             | No                   | -           | NO  |

### Additional Table 4: Detailed hemodynamic measurements and clinical characteristics of validation cohorts

Table A contains the details from validation cohort one while Table B contains the details from validation cohort two
